# Supplementary material for: Humoral and Cellular Immunity following Five Doses of COVID-19 Vaccines in Solid Organ Transplant Recipients: A Systematic Review and Meta-Analysis
Source: MDPI journal article supplement (doi:10.3390/vaccines11071166), 2023-06-27

**Figure (S1): Pooled proportion of +ve antispike Ab after the first dose administration:**

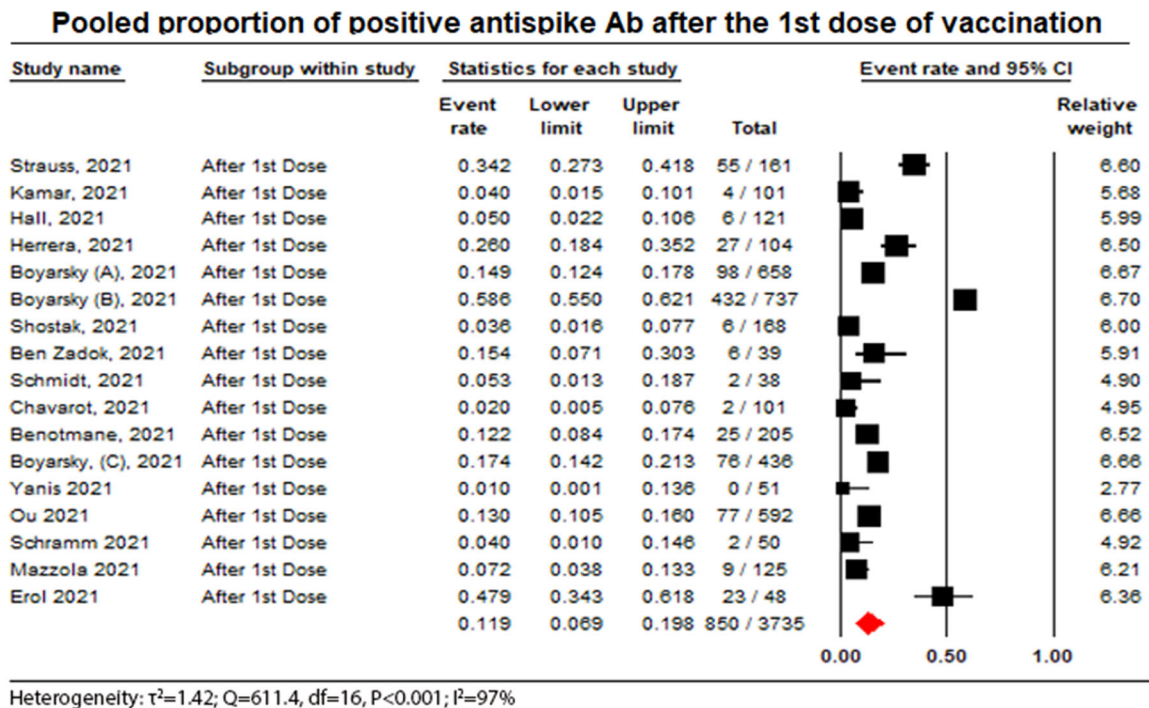

#Studies: 17 #Patients: 3735 #Response: 850  
 #Proportion (95%CI): 0.12 (0.07 to 0.2)

The pooled proportion of positive antispike Ab after the first dose of vaccination from the random effects model is 0.12 (95%CI: 0.07 to 0.2). There is a considerable heterogeneity between studies reporting seroconversion after administration of the second dose of the vaccine ( $I^2 = 81.6\%$ ).

**Table (S1): sensitivity analysis showing the results after one study removal from the 17 studies used in the above forest plot:**

| Studies             | Statistics with study removed |             |             |         |
|---------------------|-------------------------------|-------------|-------------|---------|
|                     | Estimate                      | Lower limit | Upper limit | p-Value |
| Strauss, 2021       | 0.108                         | 0.059       | 0.189       | < 0.001 |
| Kamar, 2021         | 0.127                         | 0.073       | 0.212       | < 0.001 |
| Hall, 2021          | 0.126                         | 0.072       | 0.210       | < 0.001 |
| Herrera, 2021       | 0.111                         | 0.062       | 0.192       | < 0.001 |
| Boyarsky (A), 2021  | 0.116                         | 0.063       | 0.202       | < 0.001 |
| Boyarsky (B), 2021  | 0.116                         | 0.082       | 0.161       | < 0.001 |
| Shostak, 2021       | 0.128                         | 0.074       | 0.214       | < 0.001 |
| Ben Zadok, 2021     | 0.117                         | 0.066       | 0.198       | < 0.001 |
| Schmidt, 2021       | 0.124                         | 0.071       | 0.208       | < 0.001 |
| Chavarot, 2021      | 0.130                         | 0.075       | 0.216       | < 0.001 |
| Benotmane, 2021     | 0.118                         | 0.067       | 0.202       | < 0.001 |
| Boyarsky, (C), 2021 | 0.114                         | 0.062       | 0.200       | < 0.001 |
| Yanis 2021          | 0.127                         | 0.073       | 0.211       | < 0.001 |
| Ou 2021             | 0.117                         | 0.065       | 0.202       | < 0.001 |
| Schramm 2021        | 0.125                         | 0.072       | 0.210       | < 0.001 |
| Mazzola 2021        | 0.123                         | 0.070       | 0.207       | < 0.001 |
| Erol 2021           | 0.106                         | 0.059       | 0.182       | < 0.001 |
| Random              | 0.119                         | 0.069       | 0.198       | < 0.001 |

This table of sensitivity analysis indicates that the results are robust in the sense that the pooled seroconversion after the first dose of vaccination will remain essentially the same (range from 10.6% to 13%) with any one study removed.

**Figure (S2) funnel plot of the 17 studies showing the immune response after the first dose:**

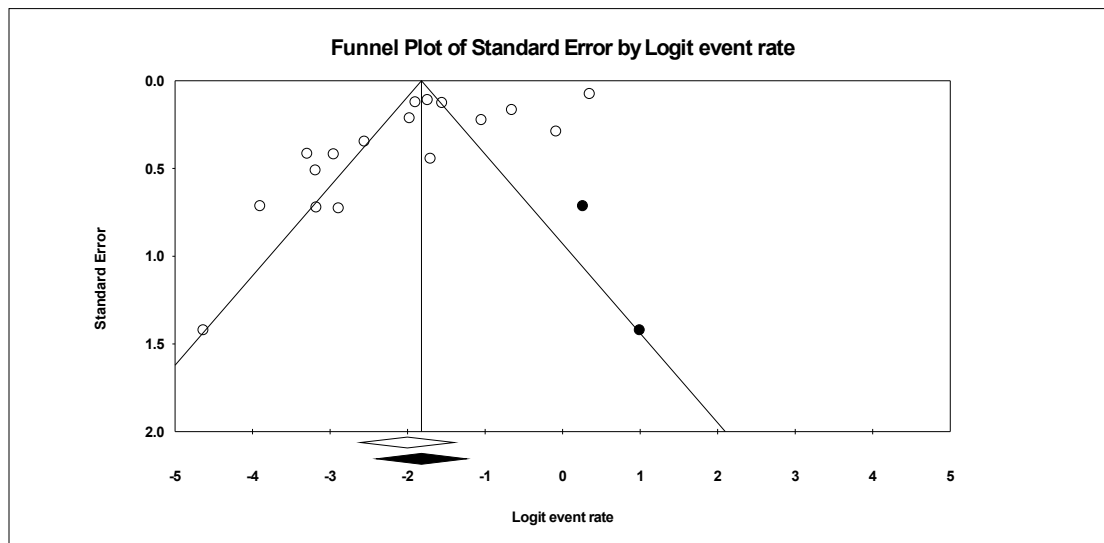

#### Egger's regression intercept

|                            |          |
|----------------------------|----------|
| Intercept                  | -5.58311 |
| Standard error             | 2.06943  |
| 95% lower limit (2-tailed) | -9.99400 |
| 95% upper limit (2-tailed) | -1.17223 |
| t-value                    | 2.69790  |
| df                         | 15.00000 |
| P-value (1-tailed)         | 0.00826  |
| P-value (2-tailed)         | 0.01653  |

#### Duval and Tweedie's trim and fill

|                        | Studies Trimmed | Fixed Effects  |             |             | Random Effects |             |             | Q Value   |
|------------------------|-----------------|----------------|-------------|-------------|----------------|-------------|-------------|-----------|
|                        |                 | Point Estimate | Lower Limit | Upper Limit | Point Estimate | Lower Limit | Upper Limit |           |
| <b>Observed values</b> |                 | 0.27674        | 0.25982     | 0.29432     | 0.11886        | 0.06861     | 0.19807     | 611.36414 |
| <b>Adjusted values</b> | 2               | 0.27804        | 0.26111     | 0.29562     | 0.13919        | 0.08284     | 0.22448     | 616.15791 |

There is evidence of publication bias in the pooled analysis of seroconversion after the first dose of vaccination. There are two studies resided at the left of the funnel are more than those on the right side. The Egger's regression intercept ( $B_0$ ) is -5.58, (95%CI: -9.99, -1.17), with  $t=2.7$ ,  $df=15$ . The 1-tailed p-value (recommended) is 0.00826, and the 2-tailed p-value is 0.01653; indicating the possibly of publication bias.

Using Trim and Fill method, the adjusted pooled proportion (random effect) of seroconversion after the second dose of vaccination would increase from to 0.12 to 0.14 (95% CI: 0.08 to 0.22) if the publication bias was not existed.

**Figure (S3): Pooled proportion of +ve antispike Ab after the second dose administration:**

**Pooled proportion of positive antispike Ab after the 2nd dose of vaccination**

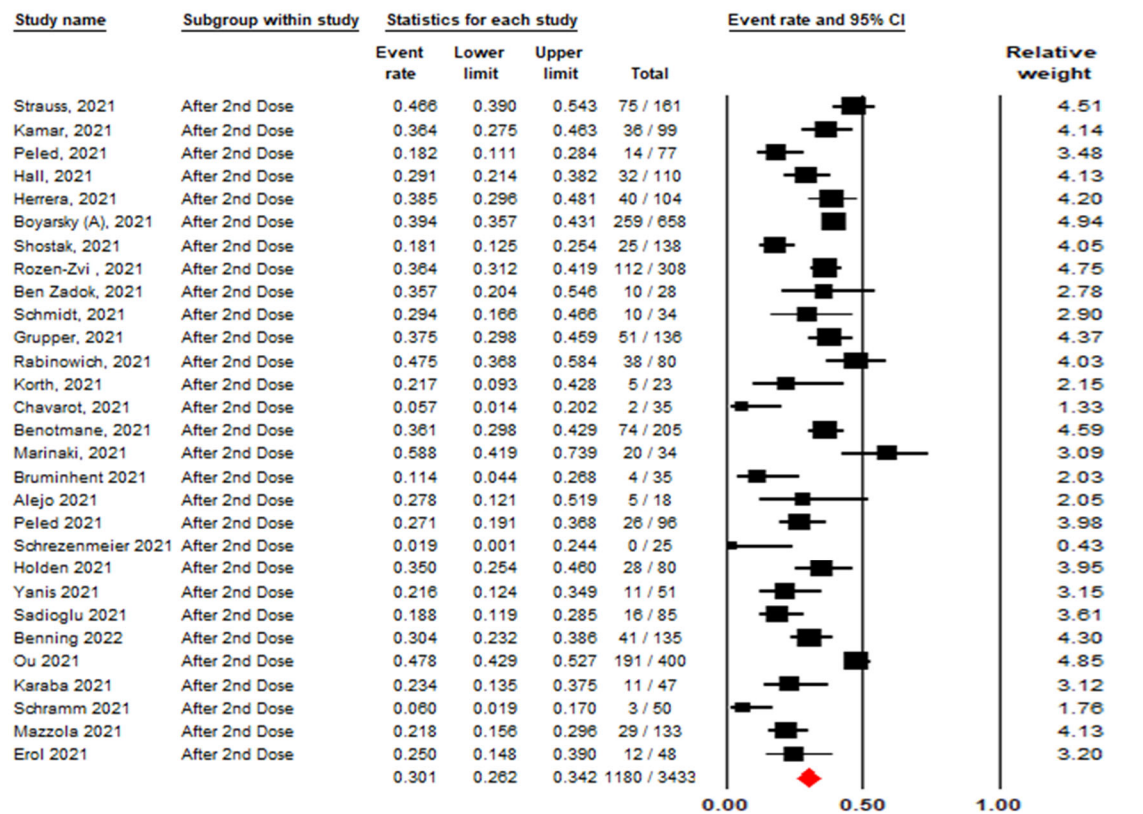

#Studies: 29 #Patients: 3433 #Response: 1180  
 #Proportion (95%CI): 0.30 (0.26 to 0.34)

The pooled proportion of positive antispike Ab after the second dose of vaccination from the random effects model is 0.3 (95%CI: 0.26 to 0.34; N = 3433). There is a substantial heterogeneity between studies reporting seroconversion after administration of the second dose of the vaccine ( $I^2 = 81.6\%$ ). Worth to notice that the seroconversion was increased from 12% after the first dose to 30% after the second dose.

**Table (S2): sensitivity analysis showing the results after one study removal from the 29 studies used in the above forest plot:**

| Study name         | Statistics with study removed |             |             |         |
|--------------------|-------------------------------|-------------|-------------|---------|
|                    | Point                         | Lower limit | Upper limit | p-Value |
| Strauss, 2021      | 0.29                          | 0.25        | 0.336       | < 0.001 |
| Kamar, 2021        | 0.30                          | 0.26        | 0.341       | < 0.001 |
| Peled, 2021        | 0.31                          | 0.27        | 0.348       | < 0.001 |
| Hall, 2021         | 0.30                          | 0.26        | 0.344       | < 0.001 |
| Herrera, 2021      | 0.30                          | 0.26        | 0.340       | < 0.001 |
| Boyarsky (A), 2021 | 0.29                          | 0.25        | 0.339       | < 0.001 |
| Shostak, 2021      | 0.31                          | 0.27        | 0.350       | < 0.001 |
| Rozen-Zvi , 2021   | 0.30                          | 0.26        | 0.340       | < 0.001 |
| Ben Zadok, 2021    | 0.30                          | 0.26        | 0.341       | < 0.001 |
| Schmidt, 2021      | 0.30                          | 0.26        | 0.343       | < 0.001 |
| Grupper, 2021      | 0.30                          | 0.26        | 0.340       | < 0.001 |
| Rabinowich, 2021   | 0.29                          | 0.26        | 0.336       | < 0.001 |
| Korth, 2021        | 0.30                          | 0.26        | 0.345       | < 0.001 |
| Chavarot, 2021     | 0.31                          | 0.27        | 0.348       | < 0.001 |
| Benotmane, 2021    | 0.30                          | 0.26        | 0.340       | < 0.001 |
| Marinaki, 2021     | 0.29                          | 0.26        | 0.335       | < 0.001 |
| Bruminhent 2021    | 0.31                          | 0.27        | 0.348       | < 0.001 |
| Alejo 2021         | 0.30                          | 0.26        | 0.343       | < 0.001 |
| Peled 2021         | 0.30                          | 0.26        | 0.345       | < 0.001 |
| Schrezenmeier 2021 | 0.30                          | 0.27        | 0.345       | < 0.001 |
| Holden 2021        | 0.30                          | 0.26        | 0.341       | < 0.001 |
| Yanis 2021         | 0.30                          | 0.26        | 0.346       | < 0.001 |
| Sadioglu 2021      | 0.31                          | 0.27        | 0.348       | < 0.001 |
| Benning 2022       | 0.30                          | 0.26        | 0.343       | < 0.001 |
| Ou 2021            | 0.29                          | 0.26        | 0.335       | < 0.001 |
| Karaba 2021        | 0.30                          | 0.26        | 0.346       | < 0.001 |
| Schramm 2021       | 0.31                          | 0.27        | 0.350       | < 0.001 |
| Mazzola 2021       | 0.31                          | 0.27        | 0.348       | < 0.001 |
| Erol 2021          | 0.30                          | 0.26        | 0.345       | < 0.001 |
| Random             | 0.30                          | 0.26        | 0.342       | < 0.001 |

This table of sensitivity analysis indicates that the results are robust in the sense that the pooled seroconversion after the second dose of vaccination will remain essentially the same (range from 29% to 31%) with any one study removed.

**Figure (S4) funnel plot of the 29 studies showing the immune response after the second dose:**

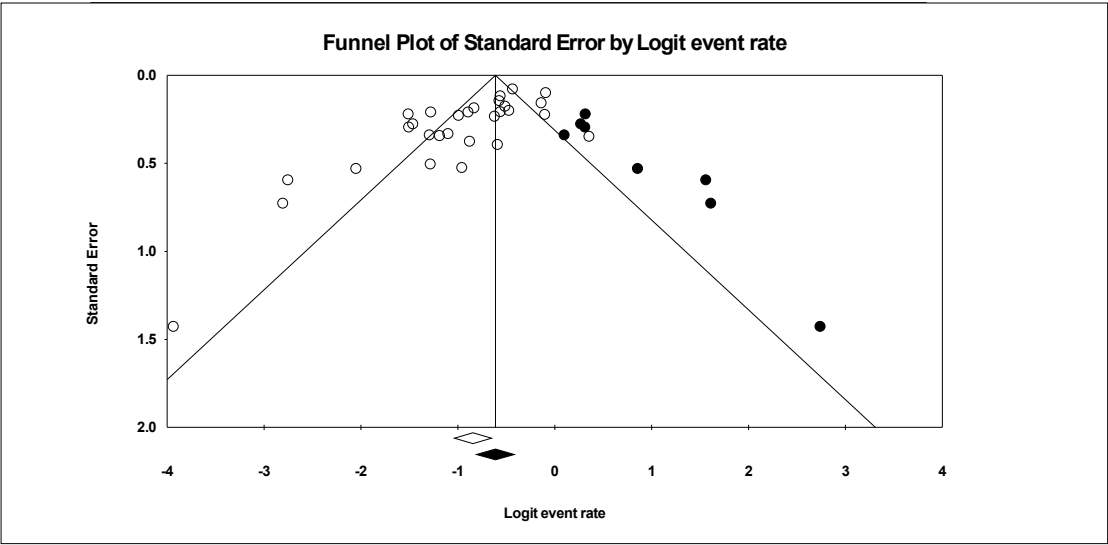

**Egger's regression intercept**

|                            |          |
|----------------------------|----------|
| Intercept                  | -2.94099 |
| Standard error             | 0.64939  |
| 95% lower limit (2-tailed) | -4.27343 |
| 95% upper limit (2-tailed) | -1.60855 |
| t-value                    | 4.52883  |
| df                         | 27.00000 |
| P-value (1-tailed)         | 0.00005  |
| P-value (2-tailed)         | 0.00011  |

**Duval and Tweedie's trim and fill**

|                        | Fixed Effects   |                |             | Random Effects |                |             | Q Value     |
|------------------------|-----------------|----------------|-------------|----------------|----------------|-------------|-------------|
|                        | Studies Trimmed | Point Estimate | Lower Limit | Upper Limit    | Point Estimate | Lower Limit | Upper Limit |
| <b>Observed values</b> |                 | 0.35755        | 0.34112     | 0.37433        | 0.30072        | 0.26213     | 0.34235     |
| <b>Adjusted values</b> | 8               | 0.37586        | 0.35972     | 0.39228        | 0.35153        | 0.30832     | 0.39732     |

There is evidence of publication bias in the pooled analysis of seroconversion after the second dose of vaccination. There are eight studies resided at the left of the

funnel are more than those on the right side. The Egger's regression intercept ( $B_0$ ) is -2.94099, (95%CI: -4.27343 to -1.60855), with  $t=4.53$   $df=27$ . The 1-tailed p-value (recommended) is 0.00005, and the 2-tailed p-value is 0.00011; indicating the possibly of publication bias.

Using Trim and Fill method, the adjusted pooled proportion (random effect) of seroconversion after the second dose of vaccination would increase from to 0.3 to 0.38 (95% CI: 0.31 to 0.4) if the publication bias was not existed.



**Figure (S5): Pooled proportion of +ve antispike Ab after the third dose administration:**

**Pooled proportion of positive antispike Ab after the 3rd dose of vaccination**

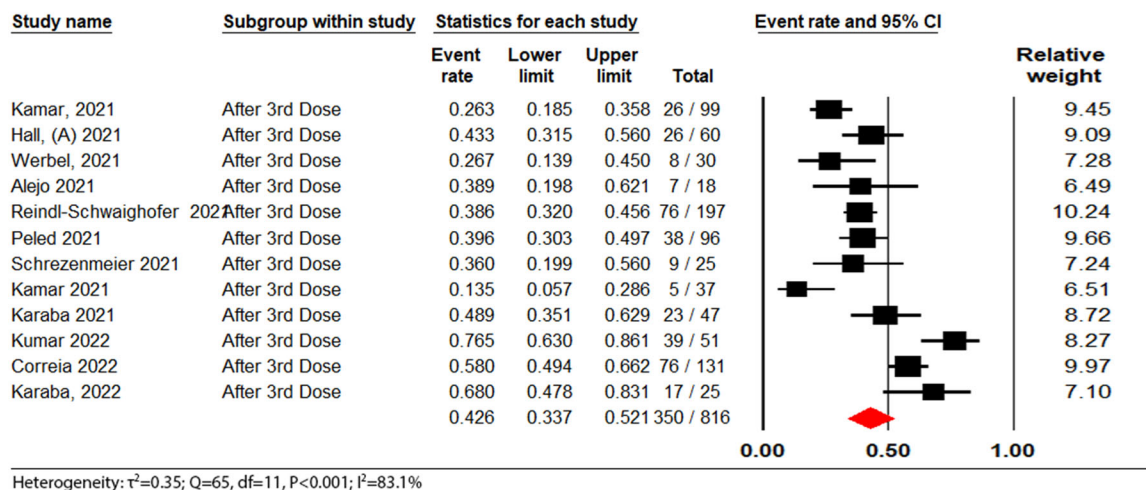

#Studies: 12 #Patients: 816 #Response: 350  
 #Proportion (95%CI): 0.43 (0.34 to 0.52)

The pooled proportion of positive antispike Ab after the third dose of vaccination from the random effects model is 0.43 (95%CI: 0.34 to 0.52; N = 816). There is a substantial heterogeneity between studies reporting seroconversion after administration of the third dose of the vaccine ( $I^2 = 83.3\%$ ).

**Table (S3): sensitivity analysis showing the results after one study removal from the 12 studies used in the above forest plot:**

| Study name               | Statistics with study removed |             |             |         |
|--------------------------|-------------------------------|-------------|-------------|---------|
|                          | Point                         | Lower limit | Upper limit | p-Value |
| Kamar, 2021              | 0.45                          | 0.35        | 0.54        | 0.27    |
| Hall, (A) 2021           | 0.43                          | 0.33        | 0.53        | 0.16    |
| Werbel, 2021             | 0.44                          | 0.35        | 0.54        | 0.23    |
| Alejo 2021               | 0.43                          | 0.33        | 0.53        | 0.16    |
| Reindl-Schwaighofer 2021 | 0.43                          | 0.33        | 0.54        | 0.21    |
| Peled 2021               | 0.43                          | 0.33        | 0.54        | 0.19    |
| Schrezenmeier 2021       | 0.43                          | 0.34        | 0.53        | 0.18    |
| Kamar 2021               | 0.45                          | 0.36        | 0.54        | 0.31    |
| Karaba 2021              | 0.42                          | 0.32        | 0.52        | 0.13    |
| Kumar 2022               | 0.40                          | 0.32        | 0.48        | 0.02    |
| Correia 2022             | 0.41                          | 0.32        | 0.51        | 0.07    |
| Karaba, 2022             | 0.41                          | 0.32        | 0.50        | 0.06    |
| Random                   | 0.43                          | 0.34        | 0.52        | 0.13    |

This table of sensitivity analysis indicates that the results are robust in the sense that the pooled seroconversion after the third dose of vaccination will remain essentially the same (range from 40% to 45%) with any one study removed.

**Figure (S6) funnel plot of the 12 studies showing the immune response after the third dose:**

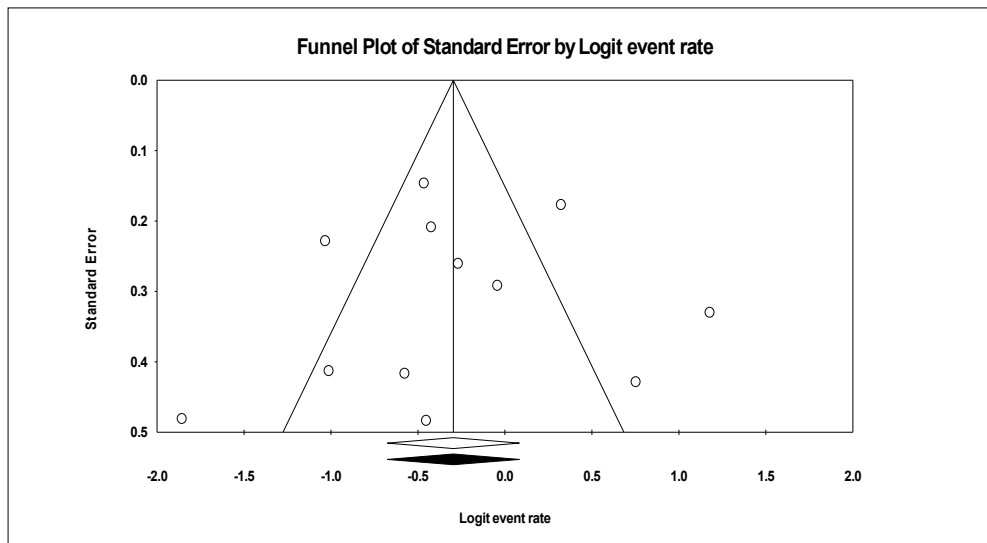

#### **Egger's regression intercept**

|                            |          |
|----------------------------|----------|
| Intercept                  | -0.33503 |
| Standard error             | 1.93866  |
| 95% lower limit (2-tailed) | -4.65463 |
| 95% upper limit (2-tailed) | 3.98457  |
| t-value                    | 0.17281  |
| df                         | 10.00000 |
| P-value (1-tailed)         | 0.43312  |
| P-value (2-tailed)         | 0.86625  |

According to the funnel plot, where the pooled studies symmetry around the mean effect size, and Egger's regression intercept test ( $P > 0.05$ ), there is no evidence of publication bias in this analysis. Moreover, with the random effects model the point estimate and 95% confidence interval for the pooled studies using Duval and Tweedie's Trim and Fill are unchanged.

**Figure (S7): Pooled proportion of +ve antispike Ab after the fourth dose administration:**

**Pooled proportion of positive antispike Ab after the 4th dose of vaccination**

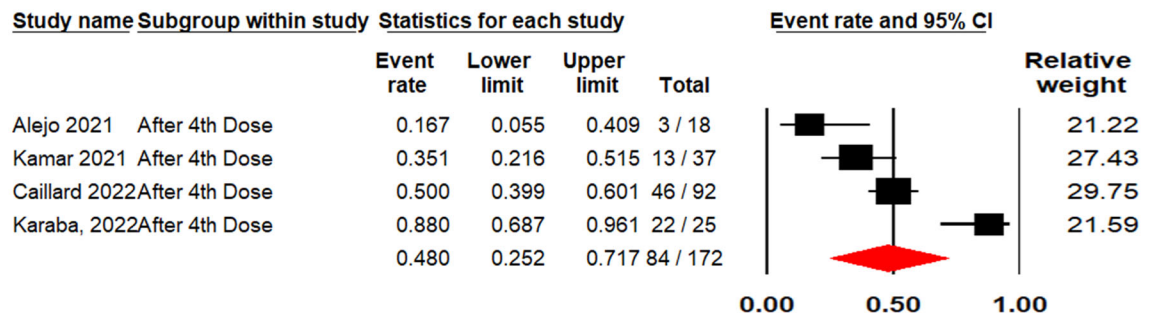

Heterogeneity:  $\tau^2=0.84$ ;  $Q=19.7$ ,  $df=3$ ,  $P=0.52$ ;  $I^2=84.8\%$

#Studies: 4 #Patients: 172 #Response: 84  
 #Proportion (95%CI): 0.48 (0.25 to 0.72)

The pooled proportion of positive antispike Ab after the fourth dose of vaccination from the random effects model is 0.48 (95%CI: 0.25 to 0.72; N = 172). There is a substantial heterogeneity between studies reporting seroconversion after administration of the second dose of the vaccine ( $I^2 = 84.8\%$ ).

**Table (S4): sensitivity analysis showing the results after one study removal from the 4 studies used in the above forest plot:**

| Study name    | Statistics with study removed |             |             |         |
|---------------|-------------------------------|-------------|-------------|---------|
|               | Point                         | Lower limit | Upper limit | p-Value |
| Alejo 2021    | 0.58                          | 0.32        | 0.80        | 0.56    |
| Kamar 2021    | 0.53                          | 0.19        | 0.85        | 0.88    |
| Caillard 2022 | 0.48                          | 0.13        | 0.85        | 0.92    |
| Karaba, 2022  | 0.36                          | 0.21        | 0.55        | 0.15    |
| Random        | 0.48                          | 0.25        | 0.72        | 0.88    |

This table of sensitivity analysis indicates that the results are not robust since the pooled seroconversion declined to 36% when Karaba 2022 (relative weight of study is 21.2%) study removed and increased to 58% when Alejo 2021 (relative weight of study is 21.2%) study removed from the analysis. However, the low number of studies included in the analysis may explain the compromised sensitivity analysis.

**Figure (S8) funnel plot of the 4 studies showing the immune response after the Fourth dose:**

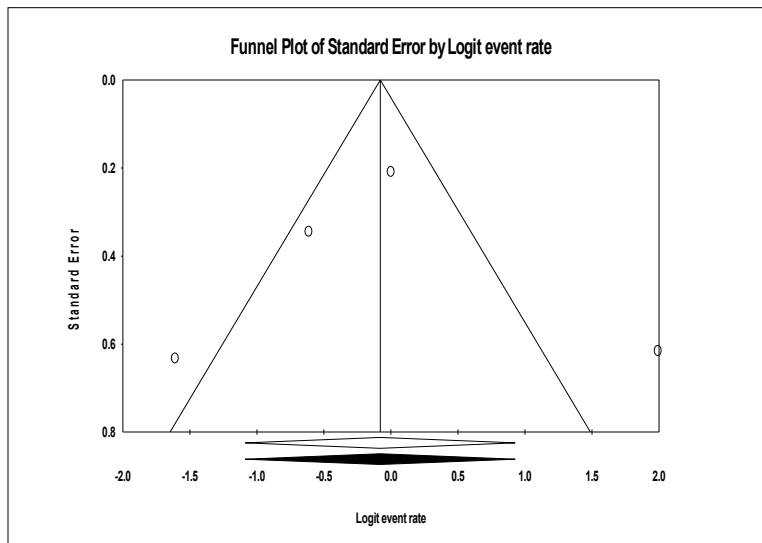

**Egger's regression intercept**

|                            |           |
|----------------------------|-----------|
| Intercept                  | 0.11384   |
| Standard error             | 3.62815   |
| 95% lower limit (2-tailed) | -15.49683 |
| 95% upper limit (2-tailed) | 15.72450  |
| t-value                    | 0.03138   |
| df                         | 2.00000   |
| P-value (1-tailed)         | 0.48891   |
| P-value (2-tailed)         | 0.97782   |

According to the funnel plot, where the pooled studies symmetry around the mean effect size, and Egger's regression intercept test ( $P > 0.05$ ), there is no evidence of publication bias in this analysis. Moreover, with the random effects model the point estimate and 95% confidence interval for the pooled studies using Duval and Tweedie's Trim and Fill are unchanged.

**Figure (S9): Pooled proportion of +ve antispikes Ab after all doses administration:**

**Pooled proportion of positive antispikes Ab after all doses of vaccination**

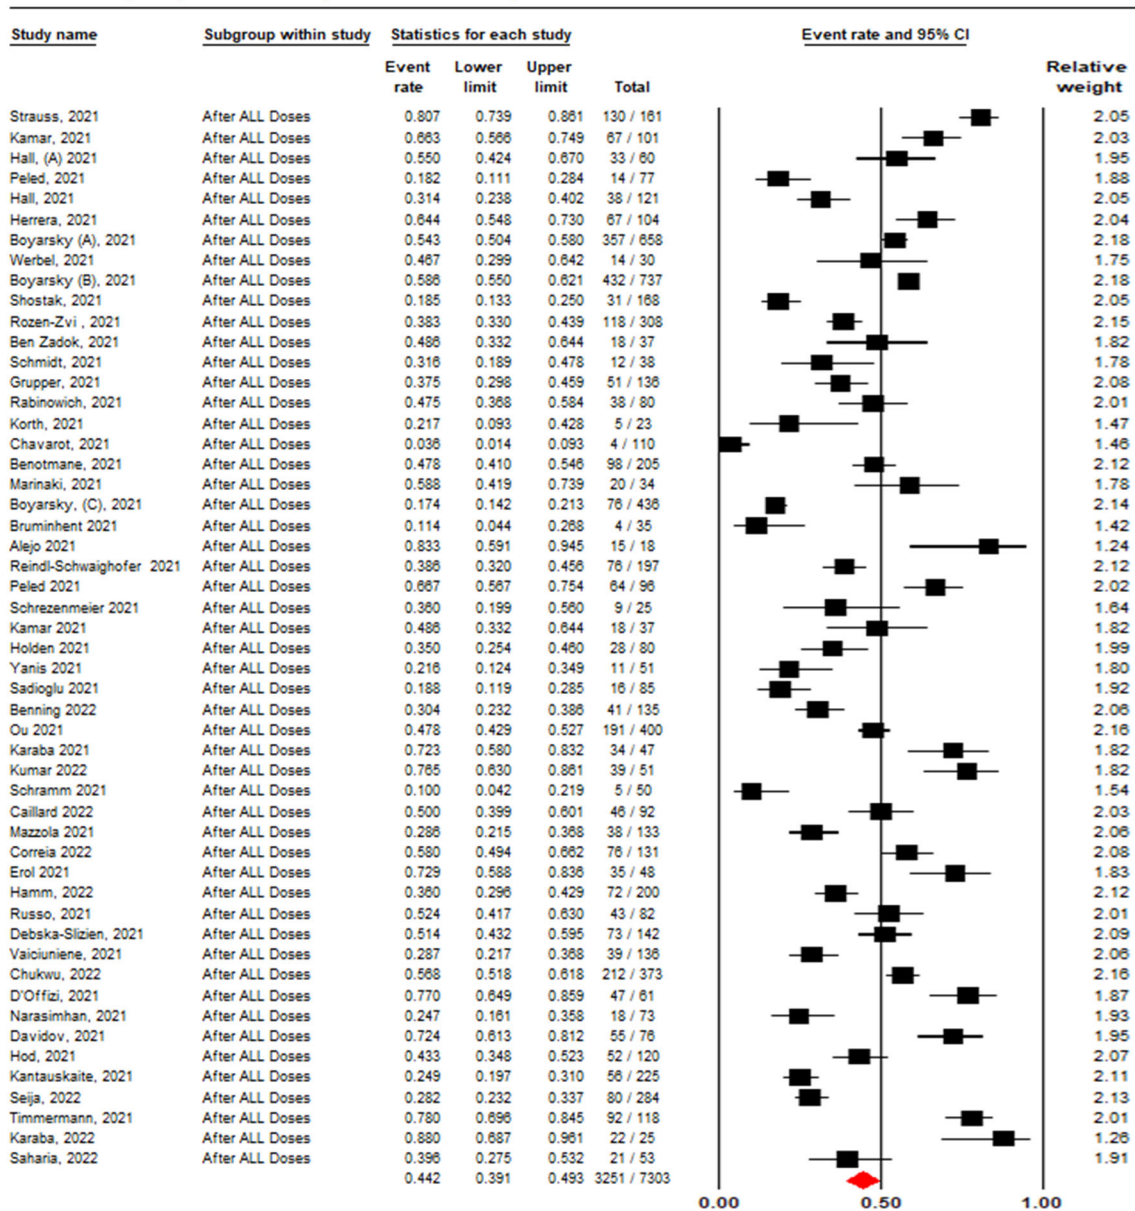

Heterogeneity:  $\tau^2=0.51$ ;  $Q=812.5$ ,  $df=51$ ,  $P<0.001$ ;  $I^2=93.7\%$

#Studies: 52 #Patients: 7303 #Response: 3251  
#Proportion (95%CI): 0.44 (0.39 to 0.49)

The pooled proportion of positive antispikes Ab after the administration of all doses of vaccination from the random effects model is 0.44 (95%CI: 0.39 to 0.49; N = 7303). There is a considerable heterogeneity between studies reporting seroconversion after administration of all doses of the vaccine ( $I^2 = 93.7\%$ ).



**Table (S5): sensitivity analysis showing the results after one study removal from the 52 studies used in the above forest plot:**

| Study name               | Statistics with study removed |             |             |         |
|--------------------------|-------------------------------|-------------|-------------|---------|
|                          | Point                         | Lower limit | Upper limit | p-Value |
| Strauss, 2021            | 0.43                          | 0.38        | 0.48        | 0.01    |
| Kamar, 2021              | 0.44                          | 0.39        | 0.49        | 0.02    |
| Hall, (A) 2021           | 0.44                          | 0.39        | 0.49        | 0.02    |
| Peled, 2021              | 0.45                          | 0.40        | 0.50        | 0.05    |
| Hall, 2021               | 0.44                          | 0.39        | 0.50        | 0.04    |
| Herrera, 2021            | 0.44                          | 0.39        | 0.49        | 0.02    |
| Boyarsky (A), 2021       | 0.44                          | 0.39        | 0.49        | 0.03    |
| Werbel, 2021             | 0.44                          | 0.39        | 0.49        | 0.03    |
| Boyarsky (B), 2021       | 0.44                          | 0.39        | 0.49        | 0.02    |
| Shostak, 2021            | 0.45                          | 0.40        | 0.50        | 0.05    |
| Rozen-Zvi , 2021         | 0.44                          | 0.39        | 0.50        | 0.04    |
| Ben Zadok, 2021          | 0.44                          | 0.39        | 0.49        | 0.03    |
| Schmidt, 2021            | 0.44                          | 0.39        | 0.50        | 0.04    |
| Grupper, 2021            | 0.44                          | 0.39        | 0.50        | 0.03    |
| Rabinowich, 2021         | 0.44                          | 0.39        | 0.49        | 0.03    |
| Korth, 2021              | 0.45                          | 0.40        | 0.50        | 0.04    |
| Chavarot, 2021           | 0.45                          | 0.40        | 0.50        | 0.07    |
| Benotmane, 2021          | 0.44                          | 0.39        | 0.49        | 0.03    |
| Marinaki, 2021           | 0.44                          | 0.39        | 0.49        | 0.02    |
| Boyarsky, (C), 2021      | 0.45                          | 0.40        | 0.50        | 0.04    |
| Bruminhent 2021          | 0.45                          | 0.40        | 0.50        | 0.05    |
| Alejo 2021               | 0.44                          | 0.39        | 0.49        | 0.02    |
| Reindl-Schwaighofer 2021 | 0.44                          | 0.39        | 0.50        | 0.03    |
| Peled 2021               | 0.44                          | 0.39        | 0.49        | 0.02    |
| Schrezenmeier 2021       | 0.44                          | 0.39        | 0.50        | 0.03    |
| Kamar 2021               | 0.44                          | 0.39        | 0.49        | 0.03    |
| Holden 2021              | 0.44                          | 0.39        | 0.50        | 0.04    |
| Yanis 2021               | 0.45                          | 0.40        | 0.50        | 0.04    |
| Sadioglu 2021            | 0.45                          | 0.40        | 0.50        | 0.05    |
| Benning 2022             | 0.44                          | 0.39        | 0.50        | 0.04    |
| Ou 2021                  | 0.44                          | 0.39        | 0.49        | 0.03    |
| Karaba 2021              | 0.44                          | 0.39        | 0.49        | 0.02    |
| Kumar 2022               | 0.44                          | 0.39        | 0.49        | 0.01    |
| Schramm 2021             | 0.45                          | 0.40        | 0.50        | 0.05    |
| Caillard 2022            | 0.44                          | 0.39        | 0.49        | 0.03    |
| Mazzola 2021             | 0.45                          | 0.39        | 0.50        | 0.04    |
| Correia 2022             | 0.44                          | 0.39        | 0.49        | 0.02    |
| Erol 2021                | 0.44                          | 0.39        | 0.49        | 0.02    |
| Hamm, 2022               | 0.44                          | 0.39        | 0.50        | 0.04    |

|                      |      |      |      |      |
|----------------------|------|------|------|------|
| Russo, 2021          | 0.44 | 0.39 | 0.49 | 0.03 |
| Debska-Slizien, 2021 | 0.44 | 0.39 | 0.49 | 0.03 |
| Vaiciuniene, 2021    | 0.45 | 0.39 | 0.50 | 0.04 |
| Chukwu, 2022         | 0.44 | 0.39 | 0.49 | 0.02 |
| D'Offizi, 2021       | 0.43 | 0.39 | 0.49 | 0.01 |
| Narasimhan, 2021     | 0.45 | 0.40 | 0.50 | 0.04 |
| Davidov, 2021        | 0.44 | 0.39 | 0.49 | 0.02 |
| Hod, 2021            | 0.44 | 0.39 | 0.49 | 0.03 |
| Kantauskaite, 2021   | 0.45 | 0.40 | 0.50 | 0.04 |
| Seija, 2022          | 0.45 | 0.39 | 0.50 | 0.04 |
| Timmermann, 2021     | 0.43 | 0.38 | 0.49 | 0.01 |
| Karaba, 2022         | 0.43 | 0.38 | 0.49 | 0.01 |
| Saharia, 2022        | 0.44 | 0.39 | 0.50 | 0.03 |
| Random               | 0.44 | 0.39 | 0.49 | 0.03 |

This table of sensitivity analysis indicates that the results are robust in the sense that the pooled seroconversion after the administration of all doses of vaccination will remain essentially the same (range from 43% to 45%) with any one study removed.

**Figure (S10) funnel plot of the 52 studies showing the total accumulated seroconversion after the administration of the 4 doses**

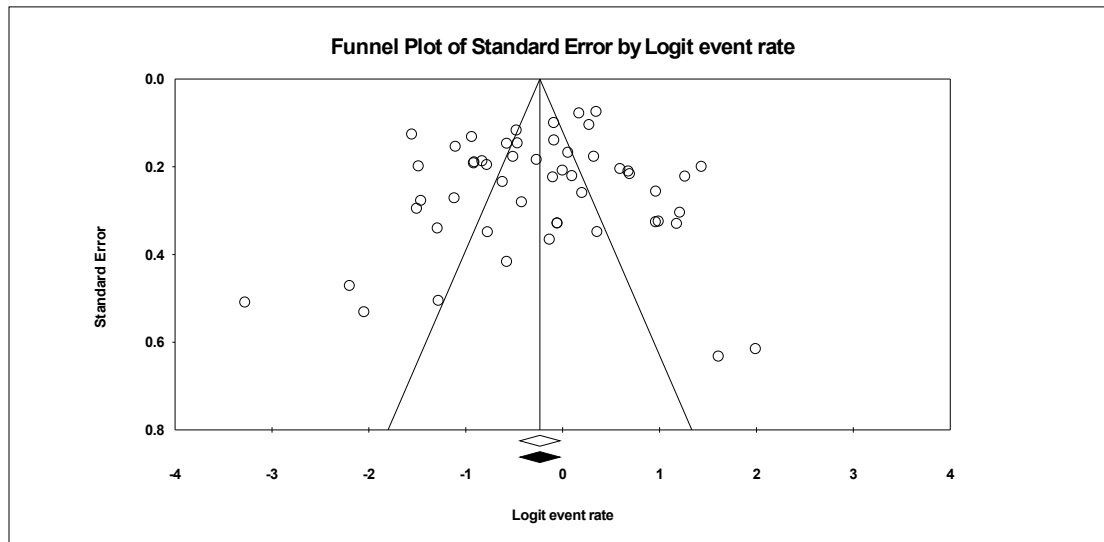

#### **Egger's regression intercept**

|                            |          |
|----------------------------|----------|
| Intercept                  | -0.97796 |
| Standard error             | 1.19657  |
| 95% lower limit (2-tailed) | -3.38135 |
| 95% upper limit (2-tailed) | 1.42542  |
| t-value                    | 0.81730  |
| df                         | 50.00000 |
| P-value (1-tailed)         | 0.20882  |
| P-value (2-tailed)         | 0.41763  |

#### **Duval and Tweedie's trim and fill**

|                 | Fixed Effects   |                |             |             | Random Effects |             |             | Q Value   |
|-----------------|-----------------|----------------|-------------|-------------|----------------|-------------|-------------|-----------|
|                 | Studies Trimmed | Point Estimate | Lower Limit | Upper Limit | Point Estimate | Lower Limit | Upper Limit |           |
| Observed values |                 | 0.45700        | 0.44475     | 0.46931     | 0.44155        | 0.39114     | 0.49321     | 812.51658 |
| Adjusted values | 0               | 0.45700        | 0.44475     | 0.46931     | 0.44155        | 0.39114     | 0.49321     | 812.51658 |

According to the funnel plot, where the pooled studies symmetry around the mean effect size, and Egger's regression intercept test ( $P > 0.05$ ), there is no evidence of publication bias in this analysis. Moreover, with the random effects model the point

estimate and 95% confidence interval for the combined studies is 0.44 (0.39, 0.49). Using Duval and Tweedie's Trim and Fill approach these values are unchanged; confirming absence of publication bias reported above from funnel plot and Egger's test.

## Subgroup comparison of seroconversion according to number of vaccine doses

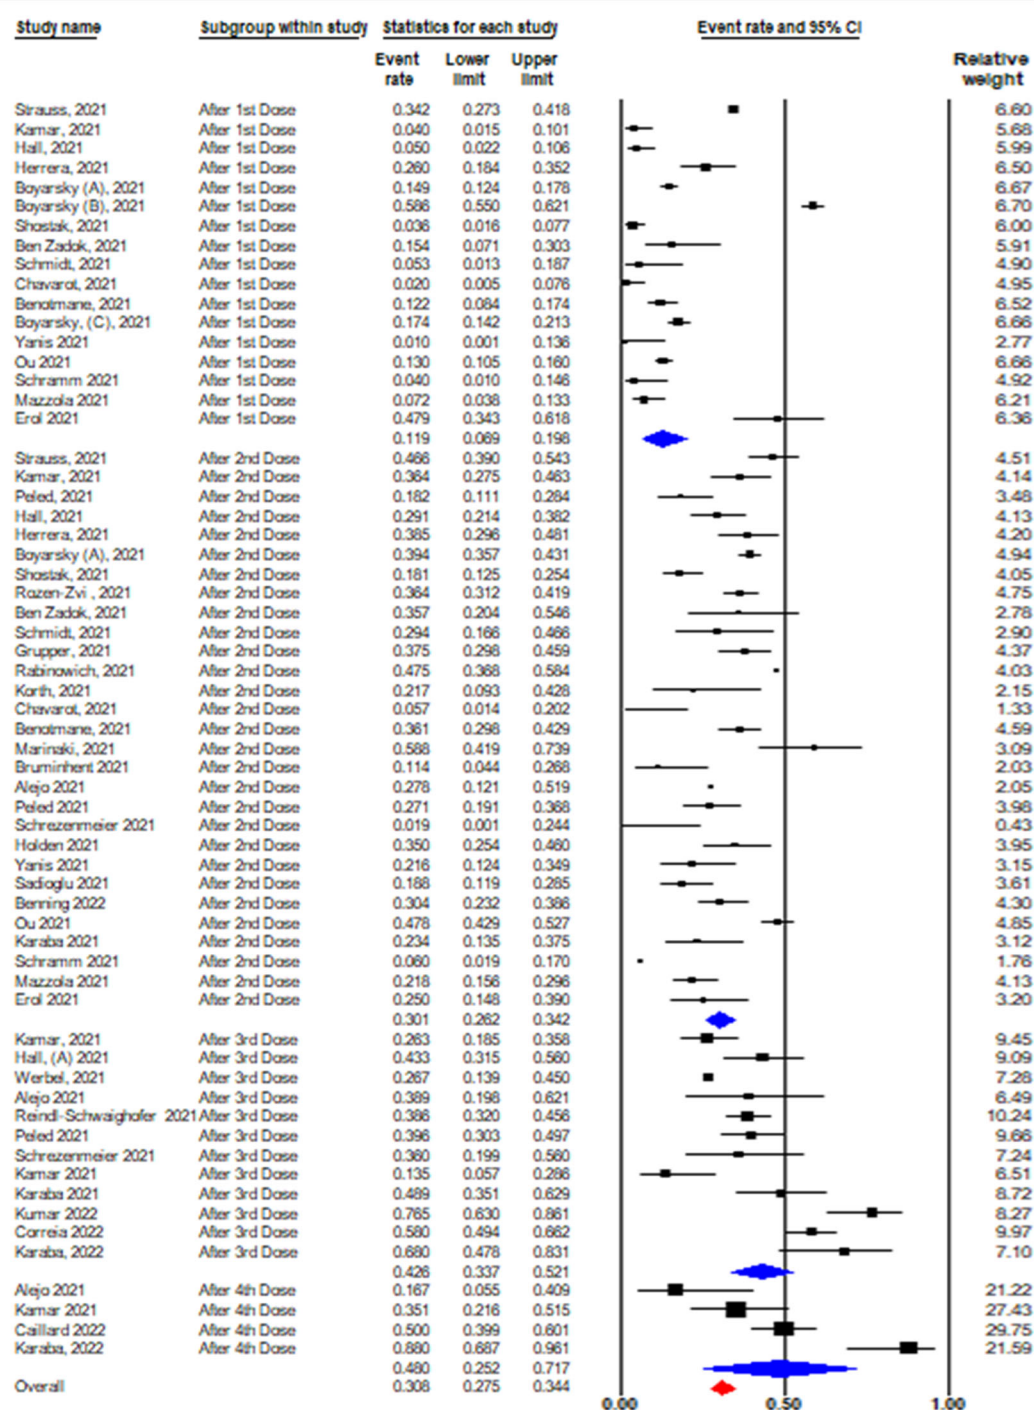

Overall heterogeneity:  $\tau^2=0.63$ ;  $Q=937.3$ ,  $df=61$ ,  $P<0.001$ ;  $I^2=93.5\%$

#Studies: 62 (Not mutually exclusive)  
 #Patients: 8156 #Response: 2464  
 #Proportion (95%CI): 0.31 (0.28 to 0.34)

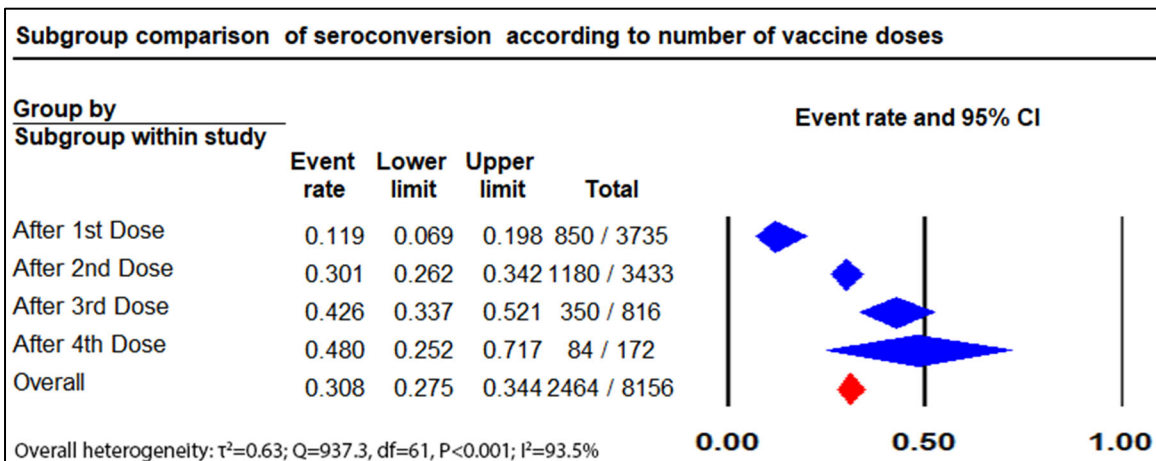

Supplement: s1 [file s1]
