# Supplementary material for: Humoral and Cellular Immunity following Five Doses of COVID-19 Vaccines in Solid Organ Transplant Recipients: A Systematic Review and Meta-Analysis
Source: MDPI journal article supplement (doi:10.3390/vaccines11071166), 2023-06-27
Supplement: s1 [file s1]

Risk of Bias Assessment (RCTs)

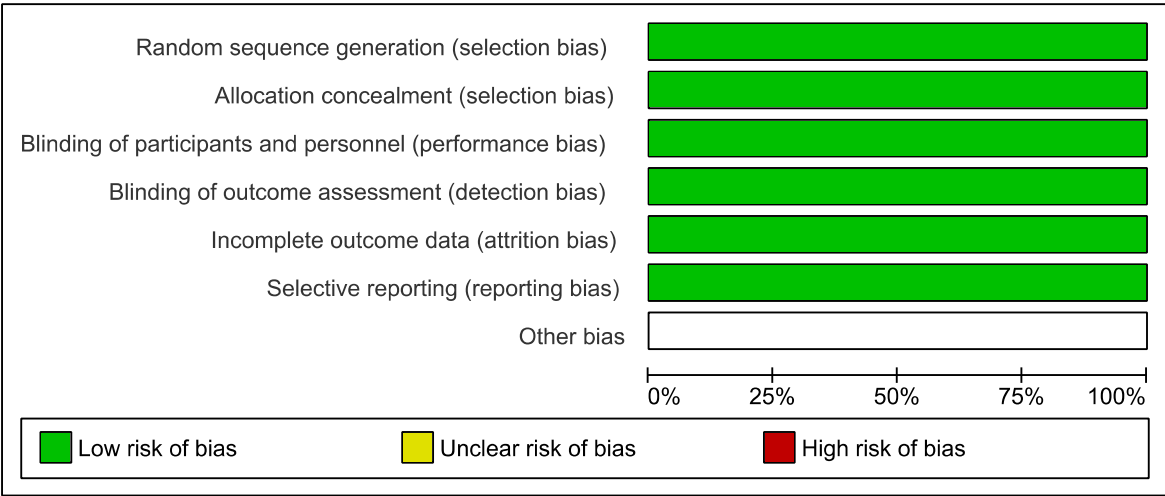

|                           | Random sequence generation (selection bias) | Allocation concealment (selection bias) | Blinding of participants and personnel (performance bias) | Blinding of outcome assessment (detection bias) | Incomplete outcome data (attrition bias) | Selective reporting (reporting bias) | Other bias |
|---------------------------|---------------------------------------------|-----------------------------------------|-----------------------------------------------------------|-------------------------------------------------|------------------------------------------|--------------------------------------|------------|
| Hall.2021                 | +                                           | +                                       | +                                                         | +                                               | +                                        | +                                    |            |
| Reindl-Schwaighofer. 2021 | +                                           | +                                       | +                                                         | +                                               | +                                        | +                                    |            |
